# Supplementary material for: Validation of Candidate Host Cell Entry Factors for Bovine Herpes Virus Type-1 Based on a Genome-Wide CRISPR Knockout Screen
Source: MDPI journal article supplement (doi:10.3390/v16020297), 2024-02-15
Supplement: s1 [file s1]

# Validation of Candidate Host Cell Entry Factors for Bovine Herpes Virus Type-1 Based on a Genome-Wide CRISPR Knockout Screen

Wenfang Spring Tan <sup>1,\*,+</sup>, Enguang Rong <sup>1,+</sup>, Inga Dry <sup>1</sup>, Simon Lillico <sup>2,3</sup>, Andy Law <sup>4</sup>, Paul Digard <sup>1</sup>, Bruce Whitelaw <sup>2,4</sup> and Robert G. Dalziel <sup>1</sup>

<sup>1</sup> Division of Infection and Immunity, the Roslin Institute, Easter Bush Campus, University of Edinburgh, Edinburgh EH259RG, UK; inga.dry@roslin.ed.ac.uk (I.D.); paul.digard@roslin.ed.ac.uk (P.D.); robert.dalziel@ed.ac.uk (R.G.D.)

<sup>2</sup> Division of Functional Genetics and Development, the Roslin Institute, Easter Bush Campus, University of Edinburgh, Edinburgh EH259RG, UK; simon.lillico@roslin.ed.ac.uk (S.L.); bruce.whitelaw@roslin.ed.ac.uk (B.W.)

<sup>3</sup> Centre for Tropical Livestock Genetics and Health, the Roslin Institute, Easter Bush Campus, University of Edinburgh, Edinburgh EH259RG, UK

<sup>4</sup> Division of Genetics and Genomics, the Roslin Institute, Easter Bush Campus, University of Edinburgh, Edinburgh EH259RG, UK; andy.law@roslin.ed.ac.uk

\* Correspondence: wtan2@exseed.ed.ac.uk

+ These authors contributed equally to this work.

**Keywords:** CRISPR/Cas9, BoHV-1, Cell entry, Receptors, Heparan Sulfate, Golgi apparatus, COG complex

**Supplementary Materials, Methods and Data**

## Detailed CRISPR3i cloning protocol

Step1. Digest 10ug of pKLV2-U6gRNA5(BbsI)-PGKpuro2ABFP-W (referred to as PB\_3i from now on, Addgene #67974) >=4hrs, gel purify vector and elute with 50ul H2O to obtain linear vector. Alternatively, use uncut PB\_3i in Step3 directly but background may be higher if digestion is not complete.

Step2. Assemble the re-annealing reactions below;

| Components                             | Volume (uL) |
|----------------------------------------|-------------|
| sgRNA sense + anti-sense oligo (50 µM) | 1           |
| 10X NEB Buffer 2                       | 0.5         |
| ddH2O                                  | 3.5         |
| Total                                  | 5           |

Anneal the oligos in a thermocycler by using the following parameters: 95 °C for 5 min; ramp down to 25 °C at 0.1°C/s, 4°C hold;

Mix 1ul of re-annealed oligos from each g1, g2 and g3 with 97ul nuclease free H2O for a 1:100 dilution;

Proceed with BbsI digest and ligation;

Step 3. Digestions and ligation:

Assemble the reactions in strip tubes below, replace oligo mix with H2O as negative control:

| Components                            | Volume (uL) |
|---------------------------------------|-------------|
| PB_3i (~50 ng/ul, linear or circular) | 0.25        |
| TOPO_g1tracr_H1(100ng/ul)             | 0.5         |
| TOPO_g2tracr_mU6(100ng/ul)            | 0.5         |
| Diluted oligo duplex mixes from above | 1           |
| 10X CutSmart buffer                   | 1           |
| NEB BbsI(10u/ul)                      | 0.5         |
| Quick T4 ligase(2000u/ul)             | 0.25        |
| 10mM ATP                              | 0.5         |
| 20mM DTT                              | 0.25        |
| ddH2O                                 | 5.25        |
| Total                                 | 10          |

Incubate reactions in a thermo cycler running the following program: 10 X (37°C, 5 min; 16°C, 10 min); 37°C, 30 min + 65°C, 10 min.

Step 4. Assemble the following plasmid-safe nuclease treatment and incubate reaction at 37°C for 30 min:

| Components            | Volume (uL) |
|-----------------------|-------------|
| Reaction from above   | 10          |
| PlasmidSafe buffer    | 1.5         |
| H2O                   | 1.75        |
| 10mM ATP              | 1.25        |
| Plasmid-Safe nuclease | 0.5         |
| Total                 | 15          |

Step 5. Transform 2ul of the above reactions into 25 ul of Stbl3 or NEB Stable competent cells and plate the transformed E. Coli onto Carb<sup>50</sup> or Amp<sup>100</sup> plates.

Step 6. The second day, pick colonies for bacterial PCR and start 5ml of culture for minipreps using Qiagen miniprep columns and Plasmid plus buffers with endotoxin removal. Elute with 30ul of endotoxin-free, EB, TE or H<sub>2</sub>O.

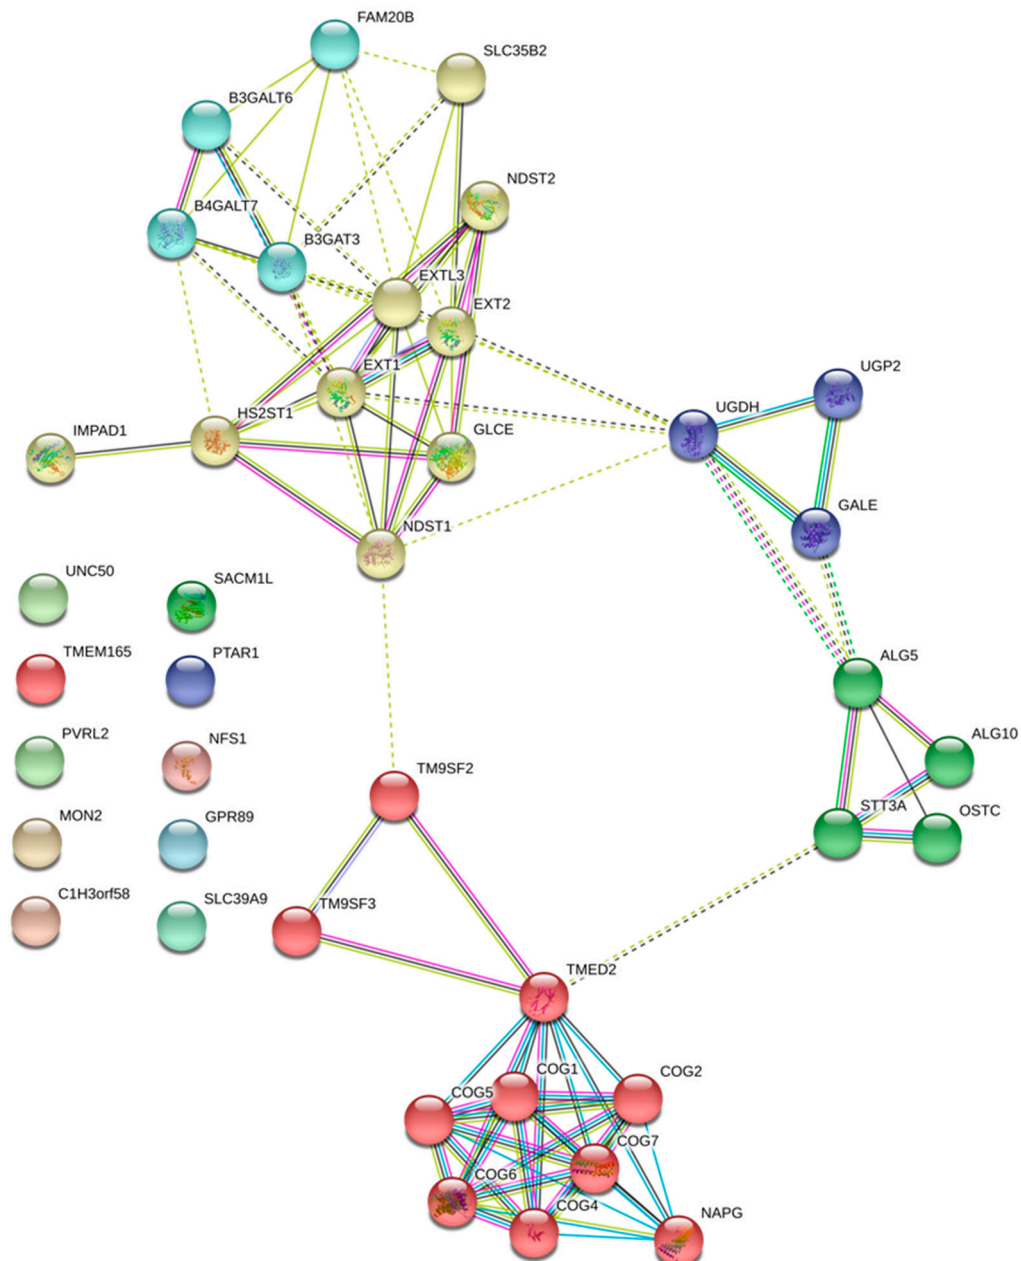

**Figure S1. STRING analysis of all candidates with suspected roles in cell entry.**

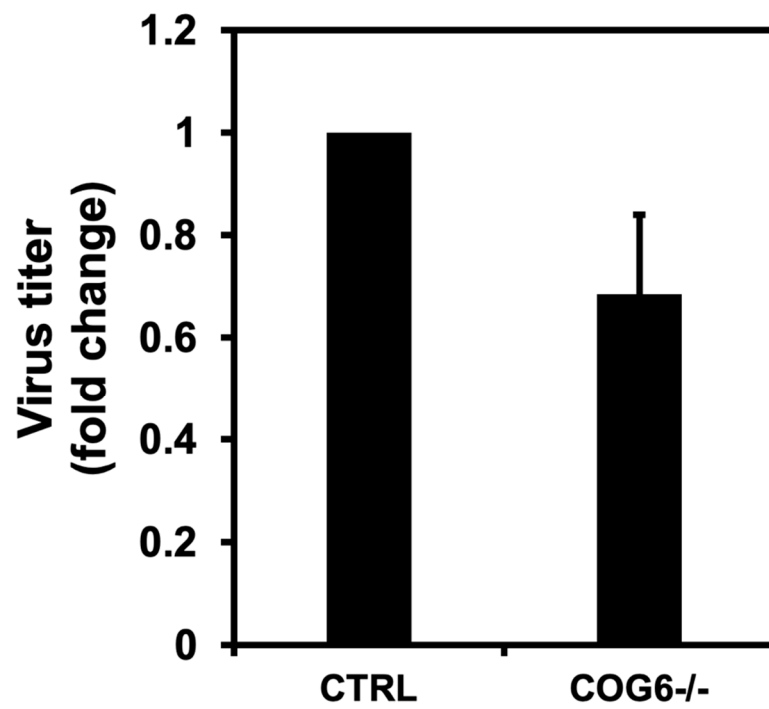

**Figure S2. COG6KO reduced AIHV-1 replication.** Plaque assay was conducted in Cas9<sup>+/+</sup> control cells and COG6 KO cells infected with AIHV-1. Virus titers are presented as relative numbers with that in controls cells set as 1 (n=3, **p=0.016**).

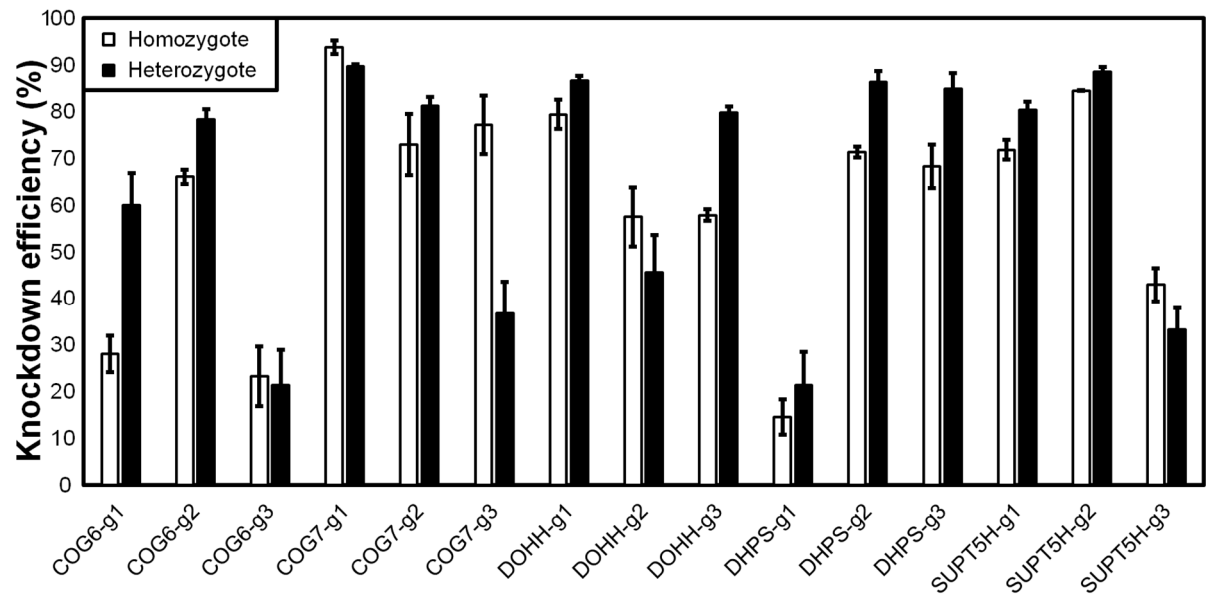

**Figure S3. Comparison of CRISPRi KD efficiency in heterozygote and homozygote dCas9 cell lines.** KD efficiency was assayed using RT-qPCR using mRNA samples collected from dCas9+/+ or dCas9/wt MDBKs transfected with PiggyBac vector expressing one of the three guides (g1,g2,g3) targeting one of the five genes tested. KD efficiency was calculated by  $2^{-\Delta\Delta CT}$  using GAPDH as an internal control.

**Table S1. Guide RNA sequences for CRISPRko and CRISPRi**

| Gene    | I.D. | Guide sequence        | purpose |
|---------|------|-----------------------|---------|
| PVR     | NA   | GCTCTTGTCAACCATTAGGGA | KO      |
| PVRL2   | NA   | GTCGGCGGCGACAATCTCAA  | KO      |
| GLCE    | NA   | CAGAGTCAAGTGCATAAGTG  | KO      |
| HST2ST1 | NA   | GATGAATGTGTAGCCGAGGG  | KO      |
| COG6    | NA   | TTACGAAAGACTTTACCGGT  | KO      |
| COG7    | NA   | GTGTTGGTAGAAATCGACC   | KO      |
| COG6    | g1   | CGGGTTGCTGGTCTGCGCCG  | CRISPRi |
| COG6    | g2   | GGACAACGACAAGGTGAGCG  | CRISPRi |
| COG6    | g3   | AGTCGTAGTGCCCGCGACTG  | CRISPRi |
| COG7    | g1   | CGTGAAGGAGTGGATCAACG  | CRISPRi |
| COG7    | g2   | CCAAGAGGTGAACCACGCCG  | CRISPRi |
| COG7    | g3   | ACATCAGCGCGCTGATCCAG  | CRISPRi |
| DOHH    | g1   | AGTGAAGAATCAGCGCGCGG  | CRISPRi |
| DOHH    | g2   | TCCGATCTGGTAGCTCACTG  | CRISPRi |
| DOHH    | g3   | TGTGAAGGATCAGGTAAGTG  | CRISPRi |
| DHPS    | g1   | CGAACTGTGCTTCAGCACGG  | CRISPRi |
| DHPS    | g2   | GTGCGCGATAGTCCACGCCA  | CRISPRi |
| DHPS    | g3   | GGTACAGCAAGTCAACGCCA  | CRISPRi |
| SUPT5H  | g1   | CGAGGACAGCAACTTCTCCG  | CRISPRi |
| SUPT5H  | g2   | AGGCTAAAGAGTCGCAAGAG  | CRISPRi |
| SUPT5H  | g3   | CCGAAGTGGGAGTTGCGCTG  | CRISPRi |

**Table S2. qPCR primers for viral genes and for CRISPRi validation**

| Gene   | Forward                    | Reverse                    |
|--------|----------------------------|----------------------------|
| UL23   | CTCTGCTACCCCTTCGCCCCGCTACT | AGGGTGCACACGACGAGGTTGGC    |
| COG6   | GAGTTTGGAACAGCCAGAAGAAGTA  | CGAGGTGTTCTTTCTCAGAAGCAGT  |
| COG7   | TGCTCCTCATTCCCAAGATGGATAG  | TTCAGGGGGGAGGGACATGATATACT |
| DOHH   | TGCTCAAGCATGAGCTGGCCTACT   | CCACCTCAACAACAGGGTTCAGTAGA |
| DHPS   | GTGGAGGAGGATTTTCATCAAGTGCT | CACTTCACACCCTCTGTGTTCTGCT  |
| SUPT5H | ATTGCCTACCAGTTCACAGACACGC  | ATCCGTCATCTCCTTGATAGGCACC  |

**Table S3. Genotypes of CRISPR KO clones**

| <b>Gene</b> | <b>Clone I.D.</b> | <b>Genotype</b> |
|-------------|-------------------|-----------------|
| PVR         | 23                | -50/-50         |
| PVR         | 25                | -2/-11          |
| PVR         | 29                | -8/-8           |
| PVR         | 32                | -5/-33          |
| PVRL2       | A4                | -1/+1           |
| PVRL2       | A11               | -4/+1           |
| PVRL2       | C11               | -4/+1           |
| PVRL2       | D5                | -19/-19         |
| GLCE        | A1                | -13/+1          |
| GLCE        | A7                | +1/+1           |
| GLCE        | B2                | -8/-8           |
| GLCE        | B8                | +1/+1           |
| HST2ST1     | A5                | +1/+1           |
| HST2ST1     | C1                | -10/-11         |
| HST2ST1     | C2                | -1/+1           |
| HST2ST1     | C4                | +1/+1           |
| COG6        | A4                | -13/-13         |
| COG6        | A6                | -1/+1           |
| COG6        | A9                | -20/-20         |
| COG6        | C3                | -152/-152       |
| COG6        | C6                | +1/+1           |
| COG7        | A3                | -32/-32         |
| COG7        | C5                | -37/-37         |
| COG7        | F3                | -13/-13         |
| COG7        | F7                | -5/-5           |

**Table S4. Oligos used for CRISPRi cloning.**

| CRISPRi sequences are underscored   |                                                                                   |
|-------------------------------------|-----------------------------------------------------------------------------------|
| Sequence Name                       | Sequence                                                                          |
| 3iG1_PTAR1::45886631+:NC_037335.1   | CAC CGA <u>TAC</u> CTA GCT TCA GGA CAC <u>GTT</u>                                 |
| 3iG1_PTAR1::45886631-:NC_037335.1   | CTT AAA <u>CGT</u> <u>GTC</u> CTG AAG CTA GGT <u>ATC</u>                          |
| 3iG2_PTAR1::45886607+:NC_037335.1   | ATC TGA <u>ACC</u> <u>AGG</u> ACT ATG GGA <u>CTC</u> <u>GTT</u> TAA               |
| 3iG2_PTAR1::45886607-:NC_037335.1   | GCT CTT AAA <u>CGA</u> <u>GTC</u> CCA TAG TCC <u>TGG</u> <u>TTC</u>               |
| 3iG3_PTAR1::45886540+:NC_037335.1   | TGT <u>TGG</u> <u>GAG</u> CTT GTT GTG <u>GAC</u> <u>ATA</u>                       |
| 3iG3_PTAR1::45886540-:NC_037335.1   | AAA <u>CTA</u> <u>TGT</u> CCA CAA CAA <u>GCT</u> <u>CCC</u>                       |
| 3iG1_SLC35B2::17762949+:NC_037350.1 | CAC <u>CGG</u> <u>GAT</u> <u>CGG</u> <u>GAG</u> AGA AGT <u>CGC</u> <u>GTT</u>     |
| 3iG1_SLC35B2::17762949-:NC_037350.1 | CTT AAA <u>CGC</u> <u>GAC</u> <u>TTC</u> TCT CCC <u>GAT</u> <u>CCC</u>            |
| 3iG2_SLC35B2::17763261+:NC_037350.1 | ATC <u>TGT</u> <u>TGC</u> ACT TCC <u>GCT</u> <u>GGC</u> <u>CGG</u> <u>GTT</u> TAA |
| 3iG2_SLC35B2::17763261-:NC_037350.1 | GCT CTT AAA <u>CCC</u> <u>GGC</u> CAG <u>CGG</u> AAG <u>TGC</u> <u>AAC</u>        |
| 3iG3_SLC35B2::17762887+:NC_037350.1 | TGT TGA <u>GGG</u> <u>CGC</u> <u>CGC</u> <u>GCC</u> TCC <u>AAC</u>                |
| 3iG3_SLC35B2::17762887-:NC_037350.1 | AAA <u>CGT</u> <u>TGG</u> <u>AGG</u> <u>CGC</u> <u>GGC</u> <u>GCC</u> <u>CTC</u>  |
| 3iG1_SLC39A9::81185607+:NC_037337.1 | CAC <u>CGC</u> <u>TCC</u> TCC AAG TCT AGA <u>GTG</u> <u>GTT</u>                   |
| 3iG1_SLC39A9::81185607-:NC_037337.1 | CTT AAA <u>CCA</u> <u>CTC</u> TAG ACT TGG <u>AGG</u> <u>AGC</u>                   |
| 3iG2_SLC39A9::81185495+:NC_037337.1 | ATC <u>TGC</u> <u>ATG</u> TTA CTC CAC TCC <u>GAG</u> <u>GTT</u> TAA               |
| 3iG2_SLC39A9::81185495-:NC_037337.1 | GCT CTT AAA <u>CCT</u> <u>CGG</u> AGT GGA <u>GTA</u> <u>ACA</u> <u>TGC</u>        |
| 3iG3_SLC39A9::81185759+:NC_037337.1 | TGT <u>TGC</u> <u>CAC</u> AAG CAA TGT TCC <u>CGA</u>                              |
| 3iG3_SLC39A9::81185759-:NC_037337.1 | AAA <u>CTC</u> <u>GGG</u> AAC ATT <u>GCT</u> TGT <u>GGC</u>                       |
| 3iG1_TM9SF2::76343648+:NC_037339.1  | CAC <u>CGG</u> <u>CGC</u> <u>CCG</u> TCA ACT TCT <u>GCG</u> <u>GTT</u>            |
| 3iG1_TM9SF2::76343648-:NC_037339.1  | CTT AAA <u>CCG</u> CAG AAG TTG <u>ACG</u> <u>GGC</u> <u>GCC</u>                   |
| 3iG2_TM9SF2::76343397+:NC_037339.1  | ATC TGA <u>CCG</u> GAA CTC TCC <u>GTC</u> <u>GCG</u> <u>GTT</u> TAA               |
| 3iG2_TM9SF2::76343397-:NC_037339.1  | GCT CTT AAA <u>CCG</u> CGA <u>CGG</u> AGA GTT <u>CCG</u> <u>GTC</u>               |
| 3iG3_TM9SF2::76343686+:NC_037339.1  | TGT <u>TGG</u> <u>CGC</u> CCA CCT TGC ACT <u>CGT</u>                              |
| 3iG3_TM9SF2::76343686-:NC_037339.1  | AAA <u>CAC</u> <u>GAG</u> TGC AAG GTG <u>GGC</u> <u>GCC</u>                       |
| 3iG1_TMED2::52090946+:NC_037344.1   | CAC <u>CGC</u> <u>AGC</u> TAT <u>CCG</u> AGT CCT <u>GGG</u> <u>GTT</u>            |
| 3iG1_TMED2::52090946-:NC_037344.1   | CTT AAA <u>CCC</u> CAG GAC TCG GAT AGC <u>TGC</u>                                 |
| 3iG2_TMED2::52091065+:NC_037344.1   | ATC <u>TGT</u> <u>TCC</u> <u>TGG</u> ACA TCG <u>ACG</u> <u>TGG</u> <u>GTT</u> TAA |
| 3iG2_TMED2::52091065-:NC_037344.1   | GCT CTT AAA <u>CCC</u> <u>ACG</u> TCG ATG TCC <u>AGG</u> <u>AAC</u>               |
| 3iG3_TMED2::52091089+:NC_037344.1   | TGT TGC <u>TCG</u> <u>GCC</u> ACC TCA AAG <u>ATG</u>                              |
| 3iG3_TMED2::52091089-:NC_037344.1   | AAA CCA TCT TTG <u>AGG</u> TGG <u>CCG</u> <u>AGC</u>                              |
| 3iG1_TMED2::70838793+:NC_037333.1   | CAC <u>CGC</u> <u>AAC</u> AGA GGA <u>CGT</u> <u>GAG</u> <u>ACA</u> <u>GTT</u>     |
| 3iG1_TMED2::70838793-:NC_037333.1   | CTT AAA <u>CTG</u> TCT CAC <u>GTC</u> CTC TGT <u>TGC</u>                          |



|                                     |                                                       |
|-------------------------------------|-------------------------------------------------------|
| 3iG2_TMEM165::70839078+:NC_037333.1 | ATC TGT <u>GGC</u> GGT TCC TTG TTC CGG GTT TAA        |
| 3iG2_TMEM165::70839078-:NC_037333.1 | GCT CTT AAA CCC GGA ACA AGG AAC CGC <u>CAC</u>        |
| 3iG3_TMEM165::70838985+:NC_037333.1 | TGT TGC <u>AGC</u> CCG GGC GCA GAT GCG                |
| 3iG3_TMEM165::70838985-:NC_037333.1 | AAA CCG CAT CTG CGC CCG GGC TGC                       |
| 3iG1_TMEM41B::43311362+:NC_037342.1 | CAC CGG GAT CCT TAC AAC ACC CAG GTT                   |
| 3iG1_TMEM41B::43311362-:NC_037342.1 | CTT AAA <u>CCT</u> GGG TGT TGT AAG GAT CCC            |
| 3iG2_TMEM41B::43311459+:NC_037342.1 | ATC TGG TCG AAA GAT CGC AAA CGG GTT TAA               |
| 3iG2_TMEM41B::43311459-:NC_037342.1 | GCT CTT AAA <u>CCC</u> GTT TGC GAT CTT TCG ACC        |
| 3iG3_TMEM41B::43311568+:NC_037342.1 | TGT TGA <u>GAC</u> CTG GGA ACC AGC GCG                |
| 3iG3_TMEM41B::43311568-:NC_037342.1 | AAA <u>CCG</u> CGC TGG TTC CCA GGT <u>CTC</u>         |
| 3iG1_UGDH::58620020+:NC_037333.1    | CAC CGT AGA AGT GGT TGC AGC ACT GTT                   |
| 3iG1_UGDH::58620020-:NC_037333.1    | CTT AAA <u>CAG</u> TGC TGC AAC CAC TTC TAC            |
| 3iG2_UGDH::58620252+:NC_037333.1    | ATC TGG GAG CAG GGA TGC AAC CGA GTT TAA               |
| 3iG2_UGDH::58620252-:NC_037333.1    | GCT CTT AAA <u>CTC</u> GGT TGC ATC CCT GCT <u>CCC</u> |
| 3iG3_UGDH::58620127+:NC_037333.1    | TGT TGG CAT <u>CCC</u> GAG AAG GGT GTG                |
| 3iG3_UGDH::58620127-:NC_037333.1    | AAA CCA CAC CCT TCT CGG GAT <u>GCC</u>                |
| 3iG1_UGP2::62288834+:NC_037338.1    | CAC CGA AGA TAG TTA TGT ACT CGG GTT                   |
| 3iG1_UGP2::62288834-:NC_037338.1    | CTT AAA <u>CCC</u> GAG TAC ATA ACT ATC TTC            |
| 3iG2_UGP2::62288971+:NC_037338.1    | ATC TGT <u>TCT</u> CAG CCG CAG AAC GCG GTT TAA        |
| 3iG2_UGP2::62288971-:NC_037338.1    | GCT CTT AAA <u>CCG</u> CGT TCT GCG GCT GAG AAC        |
| 3iG3_UGP2::62288921+:NC_037338.1    | TGT TGT <u>TGC</u> TAA AGT ATC TGT GGA                |
| 3iG3_UGP2::62288921-:NC_037338.1    | AAA <u>CTC</u> CAC AGA TAC TTT AGC AAC                |
| 3iG1_UNC50::3824412+:NC_037338.1    | CAC CGC TGC GTG CTC AAG GTA GCG GTT                   |
| 3iG1_UNC50::3824412-:NC_037338.1    | CTT AAA <u>CCG</u> CTA CCT TGA GCA CGC AGC            |
| 3iG2_UNC50::3824300+:NC_037338.1    | ATC TGC CTA AGA CCG CGA ACT CGG GTT TAA               |
| 3iG2_UNC50::3824300-:NC_037338.1    | GCT CTT AAA CCC GAG TTC GCG GTC TTA <u>GGC</u>        |
| 3iG3_UNC50::3824390+:NC_037338.1    | TGT TGC <u>CTG</u> GCG CTC GGA TGA CCG                |
| 3iG3_UNC50::3824390-:NC_037338.1    | AAA CCG GTC ATC CGA GCG CCA GGC                       |
| 3iG1_nc_guide74+                    | CAC CGC GCG GCG TCC ATA TCA CGT GTT                   |
| 3iG1_nc_guide74_                    | CTT AAA CAC GTG ATA TGG ACG CCG CGC                   |
| 3iG2_nc_guide95+                    | ATC TGC GTA CTC GTA TAC TAC TCG GTT TAA               |
| 3iG2_nc_guide95-                    | GCT CTT AAA <u>CCG</u> AGT AGT ATA CGA GTA <u>CGC</u> |
| 3iG3_nc_guide606+                   | TGT TGT <u>GAC</u> GCG TGG TCG AAC CGC                |
| 3iG3_nc_guide606-                   | AAA <u>CGC</u> GGT TCG ACC ACG CGT <u>CAC</u>         |
